# Supplementary material
Source: PubMed Central journal article supplement (PMC5866152)

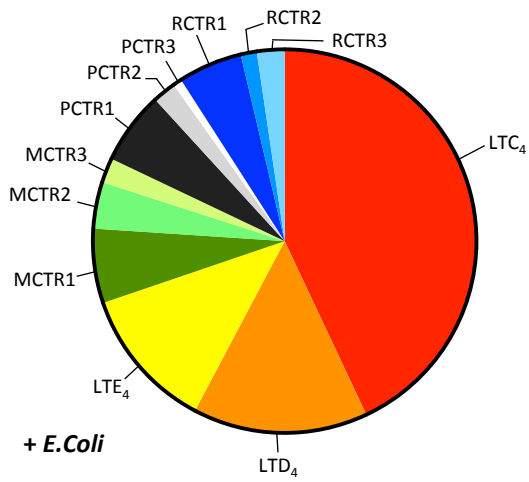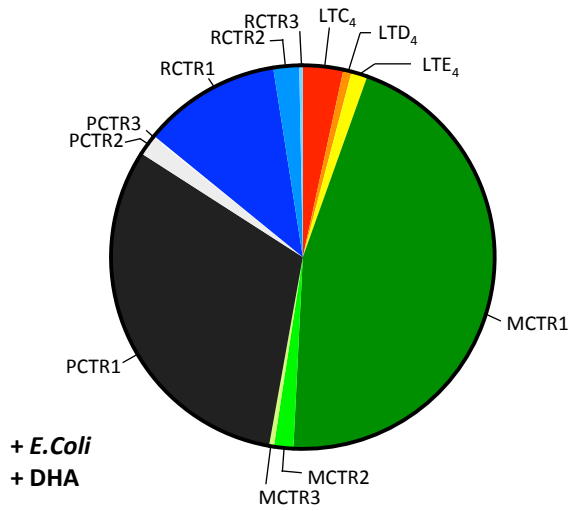

Supplement: mmc1.pdf [file mmc1.pdf]

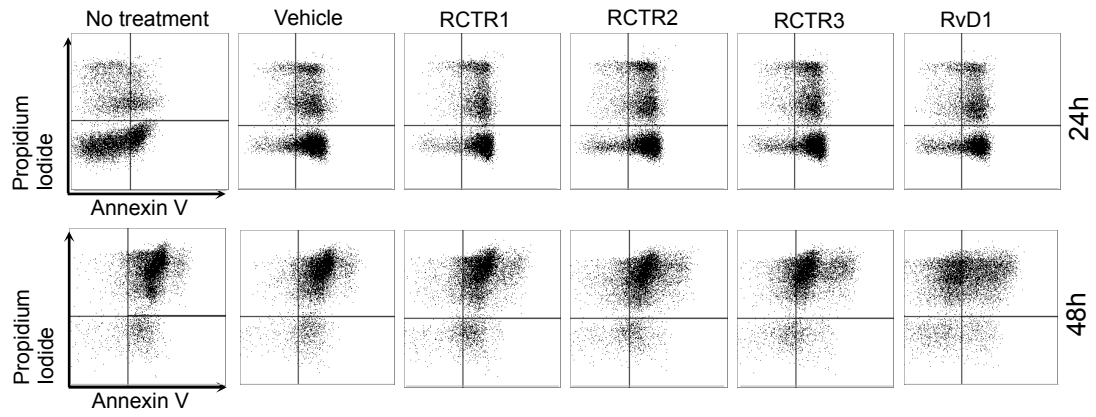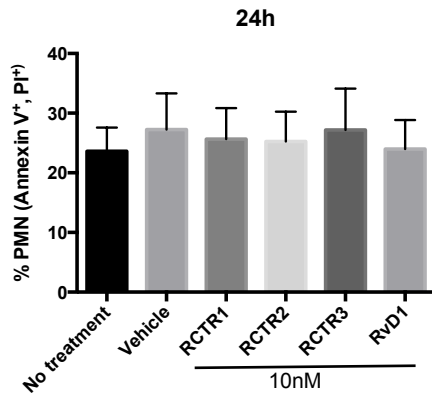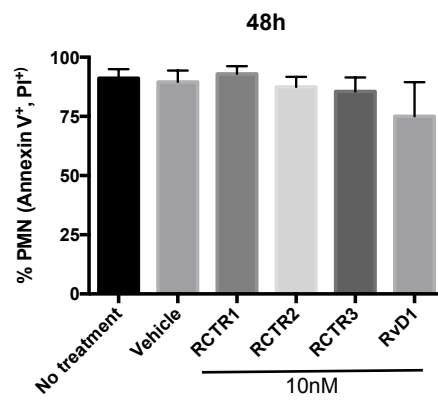

Supplement: mmc3.pdf [file mmc3.pdf]
